# Supplementary material
Source: PubMed Central journal article supplement (PMC4733197)
Supplement: JCM.02469-15_zjm999094770so1.pdf [file JCM.02469-15_zjm999094770so1.pdf]

1 **Supplementary Table**

2

3 **Table S1.** Summary of VLP- and NS1-MAC-ELISA results on 147 human sera tested with JEV and WNV antigens.

| Specimen no. <sup>c</sup> | VLP-MAC-ELISA    |              |                         |         | NS1-MAC-ELISA |              |            |         |
|---------------------------|------------------|--------------|-------------------------|---------|---------------|--------------|------------|---------|
|                           | P/N <sup>a</sup> |              | IgM ratios <sup>b</sup> |         | P/N           |              | IgM ratios |         |
|                           | JEV              | WNV          | JEV/WNV                 | WNV/JEV | JEV           | WNV          | JEV/WNV    | WNV/JEV |
| JEV panel                 |                  |              |                         |         |               |              |            |         |
| 1                         | <b>18.03</b>     | 2.23         | 8.09                    | 0.00    | <b>18.57</b>  | <b>3.25</b>  | 5.72       | 0.17    |
| 2                         | <b>25.25</b>     | <b>7.59</b>  | 3.33                    | 0.30    | <b>23.53</b>  | <b>12.34</b> | 1.91       | 0.52    |
| 3                         | <b>21.71</b>     | <b>6.15</b>  | 3.53                    | 0.28    | <b>21.02</b>  | <b>10.20</b> | 2.06       | 0.49    |
| 4                         | <b>21.00</b>     | <b>3.99</b>  | 5.26                    | 0.19    | <b>17.18</b>  | <b>8.93</b>  | 1.92       | 0.52    |
| 5                         | <b>12.16</b>     | <b>4.07</b>  | 2.99                    | 0.33    | <b>13.82</b>  | <b>7.74</b>  | 1.79       | 0.56    |
| 6                         | <b>22.26</b>     | <b>4.99</b>  | 4.46                    | 0.22    | <b>17.26</b>  | <b>9.02</b>  | 1.91       | 0.52    |
| 7                         | <b>10.70</b>     | 2.25         | 4.76                    | 0.00    | <b>10.79</b>  | <b>5.25</b>  | 2.06       | 0.49    |
| 8                         | <b>17.66</b>     | 1.96         | 9.01                    | 0.00    | <b>13.28</b>  | <b>6.75</b>  | 1.97       | 0.51    |
| 9                         | <b>15.46</b>     | <b>4.21</b>  | 3.67                    | 0.27    | <b>20.90</b>  | <b>9.69</b>  | 2.16       | 0.46    |
| 10                        | <b>11.02</b>     | 2.94         | 3.75                    | 0.00    | <b>4.07</b>   | 1.27         | 3.20       | 0.00    |
| 11                        | <b>20.64</b>     | <b>7.47</b>  | 2.76                    | 0.36    | <b>21.31</b>  | <b>10.15</b> | 2.10       | 0.48    |
| 12                        | <b>14.68</b>     | 2.78         | 5.28                    | 0.00    | <b>17.92</b>  | <b>9.44</b>  | 1.90       | 0.53    |
| 13                        | <b>5.57</b>      | 2.95         | 1.89                    | 0.00    | <b>13.63</b>  | <b>7.17</b>  | 1.90       | 0.53    |
| 14                        | <b>6.68</b>      | 2.12         | 3.15                    | 0.00    | <b>13.41</b>  | <b>6.92</b>  | 1.94       | 0.52    |
| 15                        | <b>11.19</b>     | <b>3.71</b>  | 3.02                    | 0.33    | <b>21.84</b>  | <b>10.68</b> | 2.04       | 0.49    |
| 16                        | <b>6.61</b>      | 2.24         | 2.95                    | 0.00    | <b>17.37</b>  | <b>5.73</b>  | 3.03       | 0.33    |
| WNV panel                 |                  |              |                         |         |               |              |            |         |
| 1                         | 2.37             | <b>21.00</b> | 0.00                    | 8.86    | 2.94          | <b>12.25</b> | 0.00       | 4.16    |
| 2                         | 2.39             | <b>46.00</b> | 0.00                    | 19.21   | <b>4.10</b>   | <b>6.96</b>  | 0.59       | 1.70    |
| 3                         | 1.82             | <b>36.00</b> | 0.00                    | 19.75   | 2.61          | <b>4.17</b>  | 0.00       | 1.60    |

|    |             |              |      |       |             |             |      |      |
|----|-------------|--------------|------|-------|-------------|-------------|------|------|
| 4  | 1.42        | <b>51.00</b> | 0.00 | 35.97 | <b>3.25</b> | <b>6.05</b> | 0.54 | 1.86 |
| 5  | 1.99        | <b>43.00</b> | 0.00 | 21.58 | <b>3.50</b> | <b>6.00</b> | 0.58 | 1.72 |
| 6  | 2.09        | <b>50.00</b> | 0.00 | 23.92 | <b>4.57</b> | <b>7.57</b> | 0.60 | 1.66 |
| 7  | 2.17        | <b>48.00</b> | 0.00 | 22.14 | 1.30        | <b>3.59</b> | 0.00 | 2.77 |
| 8  | 1.46        | <b>44.00</b> | 0.00 | 30.05 | 1.83        | <b>5.38</b> | 0.00 | 2.94 |
| 9  | <b>3.70</b> | <b>46.00</b> | 0.08 | 12.42 | 2.68        | <b>5.66</b> | 0.00 | 2.12 |
| 10 | 2.06        | <b>50.00</b> | 0.00 | 24.28 | 2.88        | <b>5.78</b> | 0.00 | 2.01 |
| 11 | 1.78        | <b>15.00</b> | 0.00 | 8.43  | <b>4.90</b> | <b>8.72</b> | 0.56 | 1.78 |
| 12 | 2.40        | <b>25.00</b> | 0.00 | 10.43 | 2.99        | <b>6.21</b> | 0.00 | 2.08 |
| 13 | 1.18        | <b>21.61</b> | 0.00 | 18.38 | 2.67        | <b>4.01</b> | 0.00 | 1.50 |
| 14 | 1.98        | <b>11.00</b> | 0.00 | 5.55  | 2.77        | <b>3.60</b> | 0.00 | 1.30 |
| 15 | <b>4.47</b> | <b>49.00</b> | 0.09 | 10.97 | 1.83        | <b>5.23</b> | 0.00 | 2.86 |
| 16 | <b>4.76</b> | <b>48.00</b> | 0.10 | 10.07 | 1.70        | <b>5.24</b> | 0.00 | 3.08 |
| 17 | 2.71        | <b>70.32</b> | 0.00 | 25.95 | <b>5.03</b> | <b>5.79</b> | 0.87 | 1.15 |
| 18 | <b>3.19</b> | <b>56.00</b> | 0.06 | 17.53 | <b>6.93</b> | <b>7.63</b> | 0.91 | 1.10 |
| 19 | <b>3.22</b> | <b>19.00</b> | 0.17 | 5.90  | <b>5.85</b> | <b>8.93</b> | 0.66 | 1.53 |
| 20 | <b>3.61</b> | <b>48.00</b> | 0.08 | 13.28 | <b>4.63</b> | <b>6.17</b> | 0.75 | 1.33 |
| 21 | <b>6.54</b> | <b>71.92</b> | 0.09 | 11.00 | <b>3.60</b> | <b>4.25</b> | 0.85 | 1.18 |
| 22 | <b>7.68</b> | <b>68.01</b> | 0.11 | 8.86  | 1.90        | <b>4.53</b> | 0.00 | 2.39 |
| 23 | <b>9.00</b> | <b>75.47</b> | 0.12 | 8.39  | <b>3.15</b> | <b>5.45</b> | 0.58 | 1.73 |
| 24 | 2.10        | <b>49.37</b> | 0.00 | 23.48 | 2.19        | <b>4.25</b> | 0.00 | 1.94 |
| 25 | 2.86        | <b>49.00</b> | 0.00 | 17.13 | <b>7.00</b> | <b>8.21</b> | 0.85 | 1.17 |
| 26 | 2.92        | <b>45.00</b> | 0.00 | 15.41 | <b>5.83</b> | <b>6.79</b> | 0.86 | 1.16 |
| 27 | <b>8.00</b> | <b>59.00</b> | 0.14 | 7.37  | <b>5.86</b> | <b>7.36</b> | 0.80 | 1.26 |
| 28 | 1.85        | <b>46.00</b> | 0.00 | 24.88 | <b>6.31</b> | <b>8.05</b> | 0.78 | 1.28 |
| 29 | 2.18        | <b>45.00</b> | 0.00 | 20.65 | <b>7.54</b> | <b>8.44</b> | 0.89 | 1.12 |
| 30 | 2.05        | <b>28.00</b> | 0.00 | 13.67 | 1.77        | <b>3.18</b> | 0.00 | 1.79 |
| 31 | <b>3.61</b> | <b>21.00</b> | 0.17 | 5.82  | <b>4.94</b> | <b>5.55</b> | 0.89 | 1.12 |
| 32 | 2.71        | <b>23.00</b> | 0.00 | 8.49  | <b>5.12</b> | <b>5.91</b> | 0.87 | 1.15 |
| 33 | 2.41        | <b>64.18</b> | 0.00 | 26.63 | <b>7.02</b> | <b>8.43</b> | 0.83 | 1.20 |
| 34 | <b>3.30</b> | <b>24.00</b> | 0.14 | 7.28  | <b>6.83</b> | <b>7.84</b> | 0.87 | 1.15 |

|    |             |              |      |       |             |              |      |      |
|----|-------------|--------------|------|-------|-------------|--------------|------|------|
| 35 | 1.47        | <b>35.00</b> | 0.00 | 23.75 | <b>8.80</b> | <b>9.81</b>  | 0.90 | 1.11 |
| 36 | 1.66        | <b>46.00</b> | 0.00 | 27.73 | <b>3.94</b> | <b>15.88</b> | 0.25 | 4.03 |
| 37 | <b>4.32</b> | <b>46.00</b> | 0.09 | 10.64 | <b>3.22</b> | <b>13.31</b> | 0.24 | 4.13 |
| 38 | 2.03        | <b>52.00</b> | 0.00 | 25.64 | <b>3.49</b> | <b>12.01</b> | 0.29 | 3.44 |
| 39 | 2.68        | <b>39.00</b> | 0.00 | 14.57 | <b>4.12</b> | <b>15.67</b> | 0.26 | 3.80 |
| 40 | <b>4.47</b> | <b>24.17</b> | 0.19 | 5.40  | <b>5.11</b> | <b>18.76</b> | 0.27 | 3.67 |
| 41 | 2.45        | <b>14.00</b> | 0.00 | 5.73  | <b>5.10</b> | <b>16.93</b> | 0.30 | 3.32 |
| 42 | <b>4.19</b> | <b>48.00</b> | 0.09 | 11.45 | 2.54        | <b>8.11</b>  | 0.00 | 3.20 |
| 43 | 2.99        | <b>45.00</b> | 0.00 | 15.04 | <b>4.70</b> | <b>15.97</b> | 0.29 | 3.40 |
| 44 | 1.94        | <b>49.00</b> | 0.00 | 25.31 | <b>5.53</b> | <b>16.94</b> | 0.33 | 3.06 |
| 45 | <b>3.52</b> | <b>40.00</b> | 0.09 | 11.36 | <b>5.77</b> | <b>18.92</b> | 0.30 | 3.28 |
| 46 | 2.05        | <b>50.00</b> | 0.00 | 24.33 | <b>4.95</b> | <b>14.49</b> | 0.34 | 2.93 |
| 47 | <b>4.06</b> | <b>10.84</b> | 0.37 | 2.67  | <b>7.59</b> | <b>12.61</b> | 0.60 | 1.66 |
| 48 | 1.16        | <b>3.83</b>  | 0.00 | 3.30  | <b>3.64</b> | <b>4.81</b>  | 0.76 | 1.32 |
| 49 | 1.18        | <b>3.33</b>  | 0.00 | 2.83  | <b>3.15</b> | <b>4.21</b>  | 0.75 | 1.34 |
| 50 | 1.01        | <b>4.46</b>  | 0.00 | 4.43  | <b>3.73</b> | <b>5.70</b>  | 0.65 | 1.53 |
| 51 | 1.66        | <b>8.37</b>  | 0.00 | 5.05  | <b>7.11</b> | <b>10.93</b> | 0.65 | 1.54 |
| 52 | 0.97        | <b>7.40</b>  | 0.00 | 7.64  | <b>6.53</b> | <b>11.42</b> | 0.57 | 1.75 |
| 53 | <b>3.80</b> | <b>8.27</b>  | 0.46 | 2.18  | <b>5.64</b> | <b>9.53</b>  | 0.59 | 1.69 |
| 54 | 2.82        | <b>5.20</b>  | 0.00 | 1.84  | <b>3.03</b> | <b>4.69</b>  | 0.65 | 1.55 |
| 55 | 2.19        | <b>3.89</b>  | 0.00 | 1.78  | 2.78        | <b>3.94</b>  | 0.00 | 1.42 |
| 56 | 1.70        | <b>4.70</b>  | 0.00 | 2.76  | 1.73        | <b>6.18</b>  | 0.00 | 3.58 |
| 57 | 2.31        | <b>4.74</b>  | 0.00 | 2.05  | 1.80        | <b>4.90</b>  | 0.00 | 2.72 |
| 58 | 1.81        | <b>5.34</b>  | 0.00 | 2.94  | 2.23        | <b>7.48</b>  | 0.00 | 3.36 |
| 59 | 1.26        | <b>3.79</b>  | 0.00 | 3.01  | 1.53        | <b>3.95</b>  | 0.00 | 2.59 |
| 60 | 1.75        | <b>8.53</b>  | 0.00 | 4.87  | <b>4.23</b> | <b>14.11</b> | 0.30 | 3.33 |
| 61 | 1.92        | <b>7.66</b>  | 0.00 | 3.98  | 2.68        | <b>8.71</b>  | 0.00 | 3.25 |
| 62 | 2.25        | <b>9.02</b>  | 0.00 | 4.00  | 2.02        | <b>5.11</b>  | 0.00 | 2.52 |
| 63 | 1.30        | <b>4.42</b>  | 0.00 | 3.40  | 2.23        | <b>5.96</b>  | 0.00 | 2.67 |
| 64 | 1.19        | <b>4.36</b>  | 0.00 | 3.67  | <b>3.08</b> | <b>8.07</b>  | 0.38 | 2.62 |

DENV panel

|   |      |      |                 |    |      |      |    |    |
|---|------|------|-----------------|----|------|------|----|----|
| 1 | 1.85 | 0.81 | NA <sup>d</sup> | NA | 0.88 | 1.56 | NA | NA |
| 2 | 2.32 | 1.34 | NA              | NA | 0.73 | 1.61 | NA | NA |
| 3 | 2.18 | 1.15 | NA              | NA | 1.31 | 1.58 | NA | NA |
| 4 | 2.74 | 1.69 | NA              | NA | 0.98 | 1.01 | NA | NA |
| 5 | 2.11 | 1.13 | NA              | NA | 0.83 | 1.19 | NA | NA |

YFV panel

|    |             |      |    |    |      |             |    |    |
|----|-------------|------|----|----|------|-------------|----|----|
| 1  | 2.19        | 1.39 | NA | NA | 0.77 | 2.22        | NA | NA |
| 2  | 1.86        | 1.13 | NA | NA | 0.87 | 1.61        | NA | NA |
| 3  | <b>3.23</b> | 2.18 | NA | NA | 0.63 | 1.10        | NA | NA |
| 4  | 1.90        | 1.03 | NA | NA | 0.89 | 0.84        | NA | NA |
| 5  | 1.44        | 0.86 | NA | NA | 0.63 | <b>6.60</b> | NA | NA |
| 6  | 1.16        | 0.73 | NA | NA | 0.86 | 0.75        | NA | NA |
| 7  | 1.65        | 0.97 | NA | NA | 0.81 | 1.24        | NA | NA |
| 8  | 1.16        | 0.98 | NA | NA | 0.92 | 0.79        | NA | NA |
| 9  | 1.91        | 1.29 | NA | NA | 0.62 | 0.97        | NA | NA |
| 10 | 1.13        | 0.81 | NA | NA | 1.01 | 0.81        | NA | NA |

Zika panel

|   |      |      |    |    |      |      |    |    |
|---|------|------|----|----|------|------|----|----|
| 1 | 0.90 | 0.82 | NA | NA | 0.36 | 0.42 | NA | NA |
| 2 | 1.22 | 0.94 | NA | NA | 0.81 | 0.86 | NA | NA |
| 3 | 1.16 | 1.19 | NA | NA | 0.56 | 0.69 | NA | NA |
| 4 | 0.71 | 0.86 | NA | NA | 0.94 | 0.97 | NA | NA |

HTN panel

|   |      |      |    |    |      |      |    |    |
|---|------|------|----|----|------|------|----|----|
| 1 | 1.25 | 1.80 | NA | NA | 0.87 | 1.24 | NA | NA |
| 2 | 1.91 | 1.66 | NA | NA | 0.67 | 0.85 | NA | NA |
| 3 | 1.10 | 1.33 | NA | NA | 0.74 | 1.82 | NA | NA |
| 4 | 0.84 | 0.99 | NA | NA | 0.61 | 2.07 | NA | NA |
| 5 | 1.22 | 1.40 | NA | NA | 0.60 | 1.26 | NA | NA |

|   |      |      |    |    |      |      |    |    |
|---|------|------|----|----|------|------|----|----|
| 6 | 0.88 | 0.93 | NA | NA | 0.52 | 1.40 | NA | NA |
| 7 | 0.88 | 1.05 | NA | NA | 0.55 | 1.38 | NA | NA |

CHIKV panel

|   |             |      |    |    |      |      |    |    |
|---|-------------|------|----|----|------|------|----|----|
| 1 | 2.06        | 0.85 | NA | NA | 0.43 | 0.62 | NA | NA |
| 2 | <b>3.93</b> | 2.75 | NA | NA | 0.96 | 1.07 | NA | NA |
| 3 | <b>3.07</b> | 1.41 | NA | NA | 0.90 | 0.83 | NA | NA |
| 4 | 1.44        | 1.01 | NA | NA | 0.65 | 0.83 | NA | NA |
| 5 | 1.85        | 1.12 | NA | NA | 0.66 | 0.82 | NA | NA |
| 6 | 1.75        | 1.05 | NA | NA | 0.97 | 0.80 | NA | NA |

Negative panel

|    |             |      |    |    |      |      |    |    |
|----|-------------|------|----|----|------|------|----|----|
| 1  | 0.68        | 1.01 | NA | NA | 1.13 | 0.40 | NA | NA |
| 2  | 0.76        | 0.78 | NA | NA | 0.86 | 0.59 | NA | NA |
| 3  | 0.57        | 0.77 | NA | NA | 0.83 | 0.90 | NA | NA |
| 4  | 0.53        | 0.85 | NA | NA | 0.71 | 0.47 | NA | NA |
| 5  | 0.73        | 1.00 | NA | NA | 0.51 | 0.91 | NA | NA |
| 6  | 1.55        | 1.46 | NA | NA | 0.83 | 0.46 | NA | NA |
| 7  | <b>3.39</b> | 2.57 | NA | NA | 0.46 | 0.82 | NA | NA |
| 8  | 1.67        | 1.31 | NA | NA | 0.82 | 0.57 | NA | NA |
| 9  | 1.41        | 1.20 | NA | NA | 0.43 | 1.06 | NA | NA |
| 10 | 1.20        | 1.12 | NA | NA | 0.98 | 0.60 | NA | NA |
| 11 | 1.13        | 1.10 | NA | NA | 0.49 | 0.99 | NA | NA |
| 12 | 2.28        | 1.65 | NA | NA | 0.88 | 0.56 | NA | NA |
| 13 | 1.19        | 0.98 | NA | NA | 0.66 | 1.02 | NA | NA |
| 14 | 0.81        | 0.90 | NA | NA | 1.12 | 0.76 | NA | NA |
| 15 | 0.83        | 0.82 | NA | NA | 1.30 | 1.26 | NA | NA |
| 16 | 0.78        | 0.74 | NA | NA | 1.24 | 1.23 | NA | NA |
| 17 | 0.70        | 0.76 | NA | NA | 1.12 | 0.99 | NA | NA |
| 18 | 1.15        | 0.92 | NA | NA | 0.71 | 0.59 | NA | NA |
| 19 | 1.13        | 0.77 | NA | NA | 0.85 | 0.83 | NA | NA |

|    |             |      |    |    |      |      |    |    |
|----|-------------|------|----|----|------|------|----|----|
| 20 | 1.06        | 0.95 | NA | NA | 0.45 | 0.87 | NA | NA |
| 21 | 1.01        | 0.82 | NA | NA | 0.90 | 1.00 | NA | NA |
| 22 | 0.86        | 0.70 | NA | NA | 0.48 | 0.64 | NA | NA |
| 23 | 0.82        | 0.86 | NA | NA | 1.04 | 1.07 | NA | NA |
| 24 | 0.73        | 0.88 | NA | NA | 0.52 | 0.99 | NA | NA |
| 25 | 2.27        | 1.26 | NA | NA | 0.79 | 1.49 | NA | NA |
| 26 | <b>4.72</b> | 2.19 | NA | NA | 0.88 | 0.83 | NA | NA |
| 27 | 1.42        | 0.85 | NA | NA | 0.57 | 1.29 | NA | NA |
| 28 | 1.26        | 1.18 | NA | NA | 0.77 | 1.38 | NA | NA |
| 29 | 1.36        | 1.12 | NA | NA | 1.07 | 1.80 | NA | NA |
| 30 | 2.35        | 1.74 | NA | NA | 1.46 | 1.69 | NA | NA |
| 31 | 1.56        | 1.14 | NA | NA | 0.85 | 0.94 | NA | NA |
| 32 | 1.31        | 1.12 | NA | NA | 0.81 | 1.19 | NA | NA |
| 33 | 2.12        | 1.84 | NA | NA | 0.85 | 1.34 | NA | NA |
| 34 | 1.66        | 1.45 | NA | NA | 0.58 | 1.02 | NA | NA |
| 35 | 0.94        | 1.05 | NA | NA | 0.67 | 0.71 | NA | NA |

4 <sup>a</sup>Bold values indicate IgM positive serum specimens (P/N  $\geq$ 3.0).

5 <sup>b</sup>Values represent IgM ratios of JEV-to-WNV P/N values and vice versa as described in Materials and Methods. The higher of the two  
6 ratios are shown in italics.

7 <sup>c</sup>Virus abbreviations: JEV, Japanese encephalitis virus; WNV, West Nile virus, DENV, Dengue virus; YFV, Yellow Fever virus; HTN,  
8 Hantaan virus; and CHIKV, Chikungunya virus.

9 <sup>d</sup>NA, not applicable.

10
